# Supplementary material for: Racial disparities in poverty account for mortality differences in US medicare beneficiaries
Source: PubMed Central journal article supplement — SSM Popul Health. 2016 Mar 4;2:123–9. doi: 10.1016/j.ssmph.2016.02.003 (PMC4852486; doi:10.1016/j.ssmph.2016.02.003), 2016-03-04
Supplement: NIHMS766419-supplement.pdf [file NIHMS766419-supplement.pdf]

**Supplemental Figure 1. Selection of the study population**

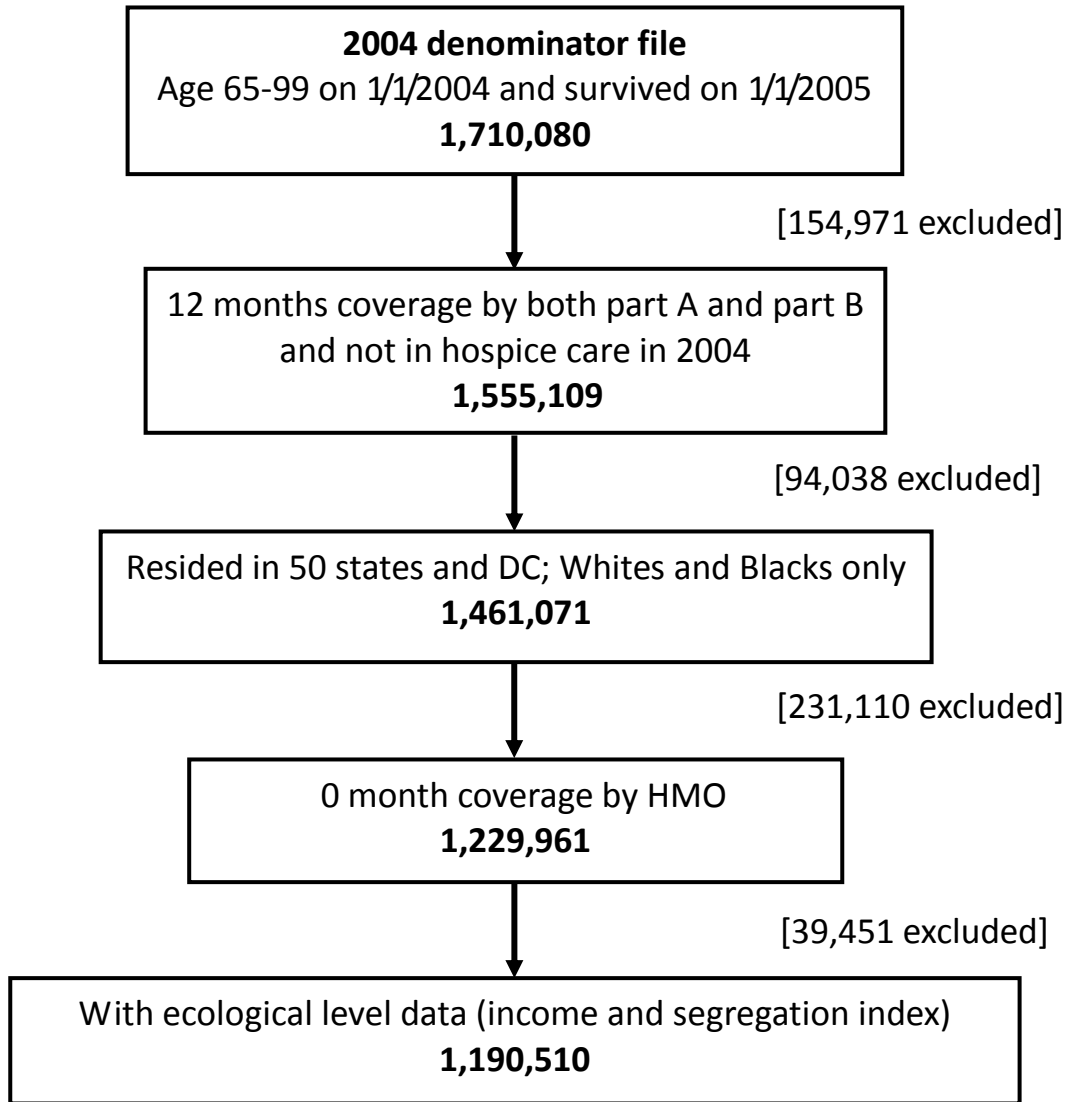

HMO: health maintenance organization

**Supplemental Figure 2. Hazard ratios (95% confidence interval) of all-cause mortality for Blacks from multivariate-adjusted Cox regression models, by age group**

**A. Results from age group 66-70 years (n=302,568)**

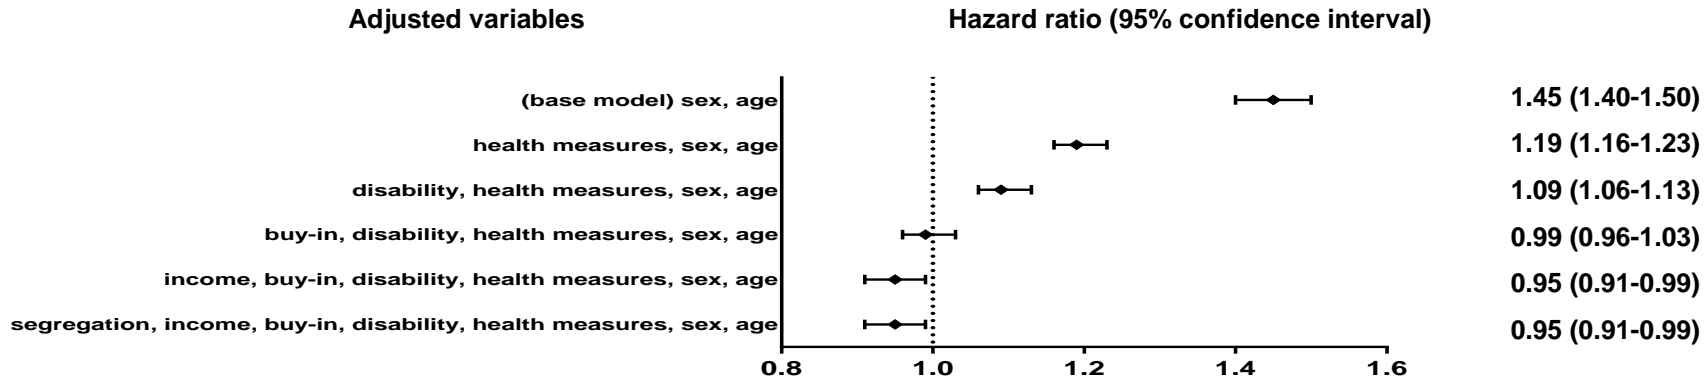

**B. Results from age group 71-75 years (n=287,556)**

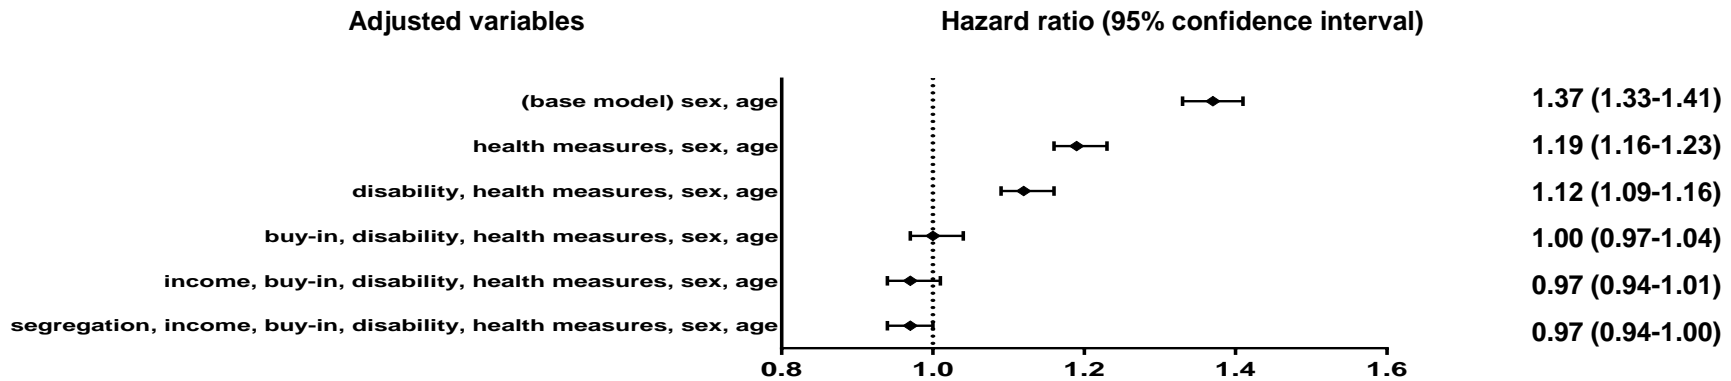

C. Results from age group 76-80 years (n=255,075)

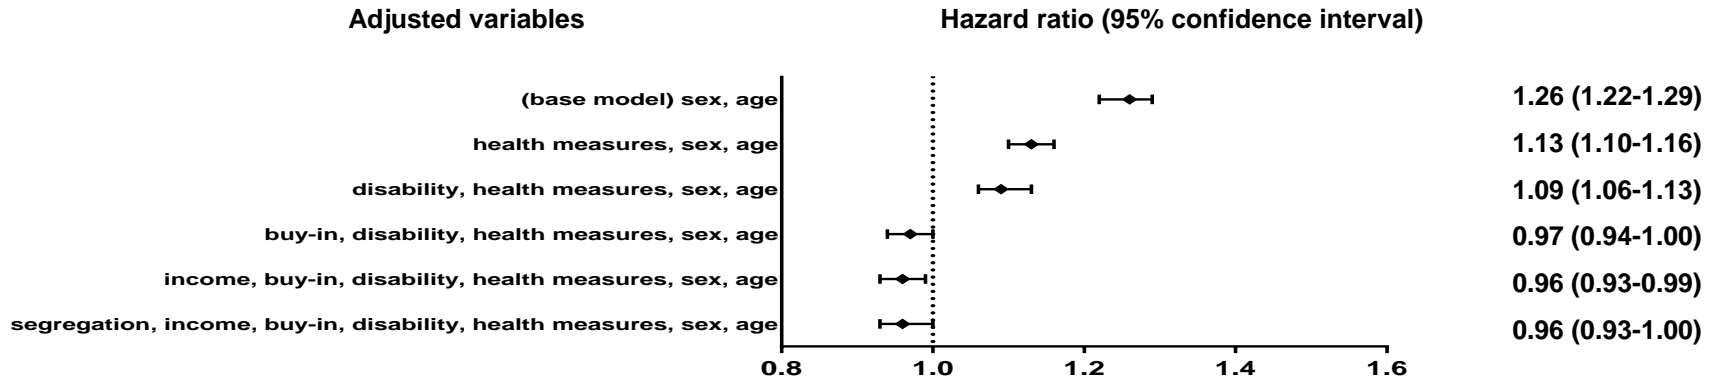

D. Results from age group 81-85 years (n=192,018)

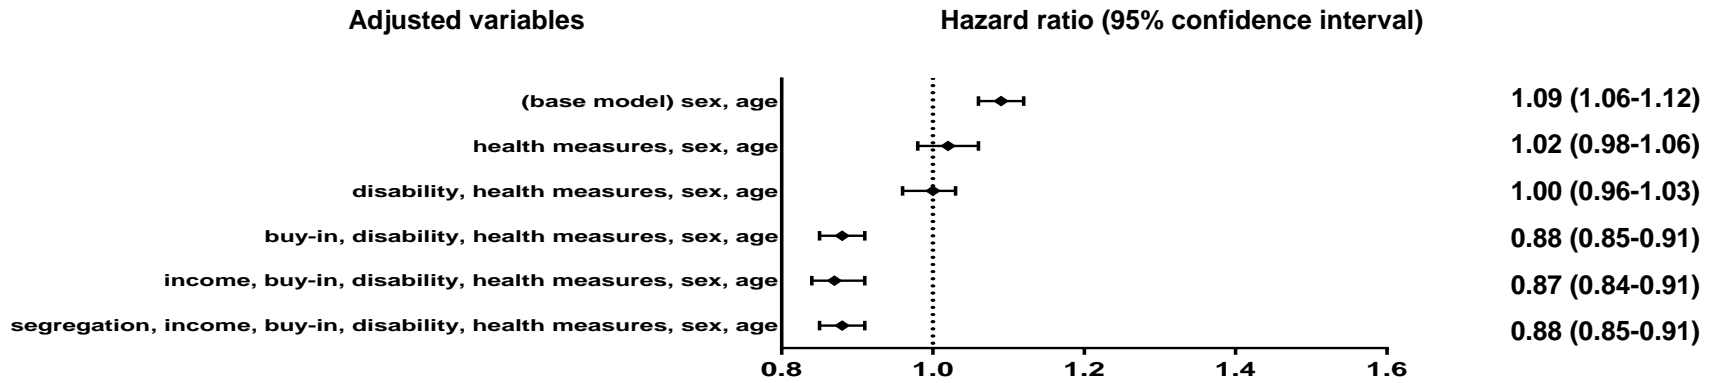

E. Results from age group 86 years old and older (n=153,293)

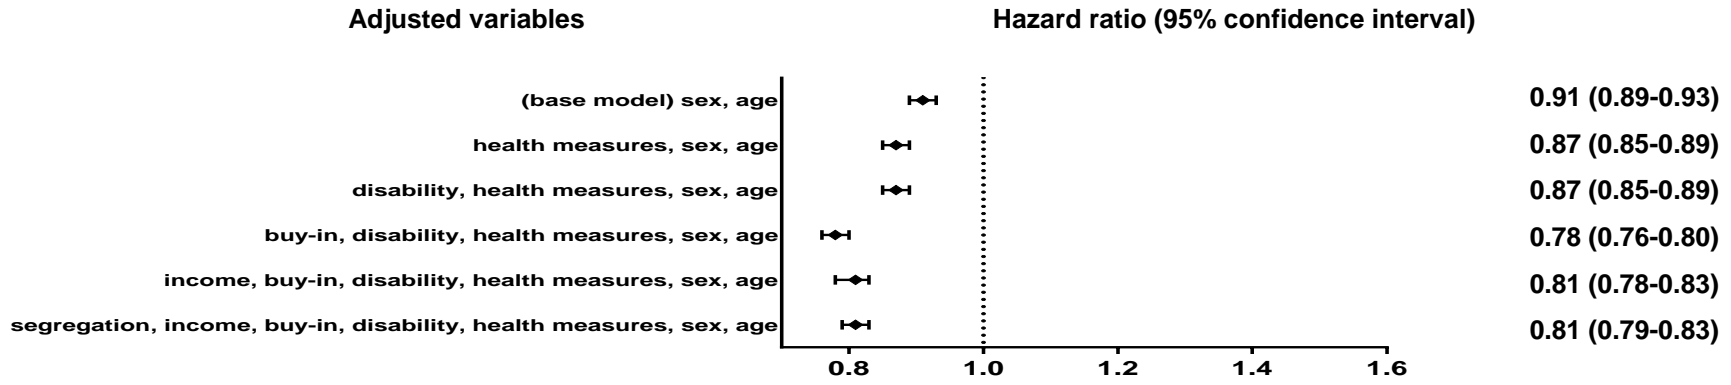

Note: Health measures include hospitalization/Charlson score and end-stage renal disease.
